# Supplementary material for: Discrimination and Characterization of Escherichia coli Originating from Clinical Cases of Femoral Head Necrosis in Broilers by MALDI-TOF Mass Spectrometry Confirms Great Heterogeneity of Isolates
Source: MDPI journal article supplement (doi:10.3390/microorganisms10071472), 2022-07-20
Supplement: s1 [file s1]

**Table S1:** *E. coli* isolates listed according their farm origin (farm no.), their naming (protocol no.), occurrence of femoral head necrosis (yes/no), serotype, PFGE profile, phylogroup. The attribution to the found MALDI-TOF MS clusters is included.

| <b>ID</b> | <b>farm<br/>no</b> | <b>protocol<br/>no.</b> | <b>femoral<br/>head<br/>necrosis</b> | <b>serotype</b> | <b>PFGE<br/>profile</b> | <b>phylogroup</b> | <b>MALDI<br/>cluster</b> |
|-----------|--------------------|-------------------------|--------------------------------------|-----------------|-------------------------|-------------------|--------------------------|
| <b>1</b>  | 1                  | 16/02297-<br>2 KnoLi 1  | no                                   | O2:K1           | BR14                    | B2                | 3                        |
| <b>2</b>  |                    | 16/02297-<br>2 KnoLi 2  | no                                   | O2:K1           | BR14                    | B2                | 3                        |
| <b>3</b>  |                    | 16/02297-<br>2 KnoLi 3  | no                                   | O2:K1           | BR14                    | B2                | 3                        |
| <b>4</b>  | 2                  | 15/22437-<br>2 KnoRe 1  | yes                                  | neg             | BR35                    | A                 | 2                        |
| <b>5</b>  |                    | 15/22437-<br>2 KnoRe 2  | yes                                  | neg             | BR23                    | D                 | 2                        |
| <b>6</b>  |                    | 15/22437-<br>2 KnoRe 3  | yes                                  | neg             | nt                      | D                 | 2                        |
| <b>7</b>  | 3                  | 15/23061-<br>1 KnoRe 1  | yes                                  | neg             | BR28                    | D                 | 2                        |
| <b>8</b>  |                    | 15/23061-<br>1 KnoRe 2  | yes                                  | neg             | BR28                    | D                 | 2                        |
| <b>9</b>  |                    | 15/23061-<br>1 KnoRe 3  | yes                                  | neg             | BR28                    | D                 | 2                        |
| <b>10</b> |                    | 16/02376-<br>3 KnoRe 1  | yes                                  | O78:K80         | BR3                     | D                 | 4                        |
| <b>11</b> |                    | 16/02376-<br>3 KnoRe 2  | yes                                  | O78:K80         | BR3                     | D                 | 4                        |
| <b>12</b> |                    | 16/02376-<br>3 KnoRe 3  | yes                                  | O78:K80         | BR3                     | D                 | 4                        |
| <b>13</b> | 4                  | 15/17099-<br>2 KnoRe 1  | yes                                  | O2:K1           | BR20                    | A                 | 2                        |
| <b>14</b> |                    | 15/17099-<br>2 KnoRe 2  | yes                                  | O2:K1           | BR20                    | A                 | 2                        |
| <b>15</b> |                    | 15/17099-<br>2 KnoRe 3  | yes                                  | O2:K1           | BR20                    | A                 | 2                        |
| <b>16</b> | 5                  | 15/23331-<br>2 KnoLi 1  | no                                   | neg             | BR47                    | D                 | 2                        |
| <b>17</b> |                    | 15/23331-<br>2 KnoLi 2  | no                                   | neg             | BR39                    | D                 | 2                        |
| <b>18</b> |                    | 15/23331-<br>2 KnoLi 3  | no                                   | neg             | BR47                    | D                 | 2                        |
| <b>19</b> |                    | 16/00909-<br>1 KnoRe 1  | no                                   | O2:K1           | BR20                    | D                 | 4                        |
| <b>20</b> |                    | 16/00909-<br>1 KnoRe 2  | no                                   | O2:K1           | BR20                    | D                 | 4                        |
| <b>21</b> |                    | 16/00909-<br>1 KnoRe 3  | no                                   | O2:K1           | BR20                    | D                 | 4                        |
| <b>22</b> |                    | 16/00909-<br>1 KnoLi 1  | yes                                  | O2:K1           | BR20                    | D                 | 4                        |

|    |   |                    |     |         |         |    |   |
|----|---|--------------------|-----|---------|---------|----|---|
| 23 |   | 16/00909-1 KnoLi 2 | yes | O2:K1   | BR20    | D  | 4 |
| 24 |   | 16/00909-1 KnoLi 3 | yes | O2:K1   | BR20    | D  | 4 |
| 25 | 6 | 15/25176-3 KnoRe 1 | no  | O2:K1   | BR20    | D  | 4 |
| 26 |   | 15/25176-3 KnoRe 2 | no  | O2:K1   | BR20    | D  | 4 |
| 27 |   | 15/25176-3 KnoRe 3 | no  | O2:K1   | BR20    | D  | 4 |
| 28 |   | 16/00911-3 KnoRe 1 | no  | O2:K1   | BR9     | B2 | 4 |
| 29 |   | 16/00911-3 KnoRe 2 | no  | O2:K1   | BR9     | B2 | 4 |
| 30 |   | 16/00911-3 KnoRe 3 | no  | O2:K1   | BR9     | B2 | 4 |
| 31 | 7 | 15/21410-3 KnoLi 1 | no  | neg     | BR10    | D  | 4 |
| 32 |   | 15/21410-3 KnoLi 2 | no  | neg     | BR17    | D  | 2 |
| 33 |   | 15/21410-3 KnoLi 3 | no  | neg     | BR10    | D  | 2 |
| 34 |   | 15/22436-2 KnoRe 1 | yes | neg     | nt      | D  | 4 |
| 35 |   | 15/22436-2 KnoRe 2 | yes | neg     | nt      | D  | 4 |
| 36 |   | 15/22436-2 KnoRe 3 | yes | neg     | nt      | D  | 4 |
| 37 |   | 16/04316-1 KnoRe 1 | yes | O78:K80 | BR5     | A  | 2 |
| 38 |   | 16/04316-1 KnoRe 2 | yes | O78:K80 | BR5     | A  | 2 |
| 39 |   | 16/04316-1 KnoRe 3 | yes | O78:K80 | BR5     | A  | 2 |
| 40 | 8 | 15/20800-1 KnoRe 1 | yes | O2:K1   | BR20ST1 | D  | 4 |
| 41 |   | 15/20800-1 KnoRe 2 | yes | O2:K1   | BR20ST1 | D  | 4 |
| 42 |   | 15/20800-1 KnoRe 3 | yes | O2:K1   | BR20ST1 | D  | 4 |
| 43 |   | 16/00369-2 KnoLi 1 | yes | O2:K1   | BR20ST1 | D  | 4 |
| 44 |   | 16/00369-2 KnoLi 2 | yes | O2:K1   | BR20ST1 | D  | 4 |
| 45 |   | 16/00369-2 KnoLi 3 | yes | O2:K1   | BR20ST1 | D  | 4 |
| 46 |   | 16/02596-3 KnoRe 1 | yes | O1:K1   | BR26    | B1 | 2 |
| 47 |   | 16/02596-3 KnoRe 2 | yes | neg     | BR26    | B1 | 2 |
| 48 |   | 16/02596-3 KnoRe 3 | yes | neg     | BR26    | B1 | 2 |

|    |    |                    |     |         |         |    |   |
|----|----|--------------------|-----|---------|---------|----|---|
| 49 |    | 16/02596-3 KnoLi 1 | yes | O78:K80 | RB38    | B1 | 2 |
| 50 |    | 16/02596-3 KnoLi 2 | yes | neg     | BR26    | B1 | 2 |
| 51 |    | 16/02596-3 KnoLi 3 | yes | O1:K1   | BR26    | B1 | 2 |
| 52 |    | 16/03879-3 KnoRe 1 | yes | O2:K1   | BR14ST1 | B2 | 3 |
| 53 |    | 16/03879-3 KnoRe 2 | yes | O2:K1   | BR14ST1 | B2 | 3 |
| 54 |    | 16/03879-3 KnoRe 3 | yes | O2:K1   | BR14ST1 | B2 | 3 |
| 55 |    | 16/03879-3 KnoLi 1 | yes | O2:K1   | BR14ST1 | B2 | 3 |
| 56 |    | 16/03879-3 KnoLi 2 | yes | O2:K1   | BR14ST1 | B2 | 3 |
| 57 |    | 16/03879-3 KnoLi 3 | yes | neg     | BR14ST1 | B2 | 3 |
| 58 | 9  | 15/19461-3 KnoRe 1 | yes | O1:K1   | BR43    | D  | 2 |
| 59 |    | 15/19461-3 KnoRe 2 | yes | O1:K1   | BR43    | D  | 2 |
| 60 |    | 15/19461-3 KnoRe 3 | yes | O1:K1   | BR43    | D  | 2 |
| 61 |    | 15/22114-1 KnoLi 1 | yes | O1:K1   | BR4     | B1 | 2 |
| 62 |    | 15/22114-1 KnoLi 2 | yes | O1:K1   | BR4     | B1 | 2 |
| 63 |    | 15/22114-1 KnoLi 3 | yes | O1:K1   | BR4     | B1 | 2 |
| 64 |    | 15/22748-1 Knoli 1 | no  | O78:K80 | nt      | D  | 2 |
| 65 |    | 15/22748-1 KnoLi 2 | no  | O78:K80 | nt      | D  | 2 |
| 66 |    | 15/22748-1 KnoLi 3 | no  | O78:K80 | nt      | D  | 2 |
| 67 | 10 | 15/23330-2 KnoRe 1 | yes | neg     | BR7     | D  | 2 |
| 68 |    | 15/23330-2 KnoRe 2 | yes | neg     | BR7     | D  | 2 |
| 69 |    | 15/23330-2 KnoRe 3 | yes | neg     | BR7     | D  | 2 |
| 70 |    | 15/24960-2 KnoRe 1 | yes | O78:K80 | BR32ST1 | D  | 4 |
| 71 |    | 15/24960-2 KnoRe 2 | yes | O78:K80 | BR32ST1 | D  | 4 |
| 72 |    | 15/24960-2 KnoRe 3 | yes | O78:K80 | BR32ST1 | D  | 4 |
| 73 |    | 16/03318-3 KnoRe 1 | yes | O1:K1   | BR19    | B2 | 4 |
| 74 |    | 16/03318-3 KnoRe 2 | yes | O1:K1   | BR19    | B2 | 4 |

|           |    |                     |     |       |         |    |   |
|-----------|----|---------------------|-----|-------|---------|----|---|
| <b>75</b> |    | 16/03318-3 KnoRe 3  | yes | O1:K1 | BR19    | B2 | 4 |
| <b>76</b> |    | 16/03318-3 KnoLi 1  | yes | O1:K1 | BR19    | B2 | 4 |
| <b>77</b> |    | 16/03318-3 KnoLi 2  | yes | O1:K1 | BR19    | B2 | 4 |
| <b>78</b> |    | 16/03318-3 KnoLi 3  | yes | neg   | BR19    | B2 | 2 |
| <b>79</b> | 11 | 15/19578-10 KnoLi 1 | no  | neg   | BR22    | A  | 2 |
| <b>80</b> |    | 15/19578-10 KnoLi 2 | no  | neg   | nt      | A  | 2 |
| <b>81</b> |    | 15/19578-10 KnoLi 3 | no  | neg   | nt      | D  | 4 |
| <b>82</b> |    | 15/24052-3 KnoRe 1  | yes | neg   | BR8ST1  | B2 | 4 |
| <b>83</b> |    | 15/24052-3 KnoRe 2  | yes | neg   | BR8ST1  | B2 | 4 |
| <b>84</b> |    | 15/24052-3 KnoRe 3  | yes | neg   | BR8ST1  | B2 | 4 |
| <b>85</b> |    | 15/24865-1 KnoRe 1  | yes | neg   | BR1     | D  | 4 |
| <b>86</b> |    | 15/24865-1 KnoRe 2  | yes | neg   | BR1     | D  | 4 |
| <b>87</b> |    | 15/24865-1 KnoRe 3  | yes | O1:K1 | BR1     | D  | 4 |
| <b>88</b> |    | 16/02899-1 KnoRe 1  | yes | O1:K1 | BR2     | D  | 4 |
| <b>89</b> |    | 16/02899-1 KnoRe 2  | yes | O1:K1 | BR2     | D  | 4 |
| <b>90</b> |    | 16/02899-1 KnoRe 3  | yes | neg   | BR2     | D  | 4 |
| <b>91</b> | 12 | 15/23060-1 KnoRe 1  | yes | neg   | BR26ST1 | B1 | 2 |
| <b>92</b> |    | 15/23060-1 KnoRe 2  | yes | neg   | BR26ST1 | B1 | 2 |
| <b>93</b> |    | 15/23060-1 KnoRe 3  | yes | neg   | BR26ST1 | B1 | 2 |
| <b>94</b> |    | 15/24413-2 KnoRe 1  | yes | neg   | BR31    | A  | 2 |
| <b>95</b> |    | 15/24413-2 KnoRe 2  | yes | neg   | BR41    | B1 | 2 |
| <b>96</b> |    | 15/24413-2 KnoRe 3  | yes | neg   | BR31    | A  | 2 |
| <b>97</b> |    | 16/02752-3 KnoLi 1  | yes | neg   | BR20ST2 | D  | 4 |
| <b>98</b> |    | 16/02752-3 KnoLi 2  | yes | neg   | BR20ST2 | D  | 4 |

|            |    |                            |     |         |         |    |   |
|------------|----|----------------------------|-----|---------|---------|----|---|
| <b>99</b>  |    | 16/02752-<br>3 KnoLi 3     | yes | neg     | BR20ST2 | D  | 4 |
| <b>100</b> | 13 | 15/23332-<br>2 KnoRe 1     | yes | neg     | BR12    | D  | 2 |
| <b>101</b> |    | 15/23332-<br>2 KnoRe 2     | yes | neg     | BR12    | D  | 2 |
| <b>102</b> |    | 15/23332-<br>2 KnoRe 3     | yes | neg     | BR12    | D  | 2 |
| <b>103</b> |    | 16/003317<br>-1 KnoRe<br>1 | no  | O78:K80 | BR32    | D  | 4 |
| <b>104</b> |    | 16/003317<br>-1 KnoRe<br>2 | no  | O78:K80 | BR32    | D  | 4 |
| <b>105</b> |    | 16/003317<br>-1 KnoRe<br>3 | no  | O78:K80 | BR32    | D  | 4 |
| <b>106</b> |    | 16/003317<br>-1 KnoLi 1    | yes | O78:K80 | BR32    | D  | 4 |
| <b>107</b> |    | 16/003317<br>-1 KnoLi 2    | yes | O78:K80 | BR32    | D  | 4 |
| <b>108</b> |    | 16/003317<br>-3 KnoLi 1    | yes | O78:K80 | BR32    | D  | 4 |
| <b>109</b> |    | 16/003317<br>-3 KnoLi 2    | yes | O78:K80 | BR32    | D  | 4 |
| <b>110</b> |    | 16/003317<br>-3 KnoLi 3    | yes | O78:K80 | BR32    | D  | 4 |
| <b>111</b> | 14 | 15/20278-<br>3 KnoRe 1     | yes | neg     | nt      | D  | 4 |
| <b>112</b> |    | 15/20278-<br>3 KnoRe 2     | yes | neg     | nt      | D  | 4 |
| <b>113</b> |    | 15/20278-<br>3 KnoRe 3     | yes | neg     | nt      | D  | 4 |
| <b>114</b> |    | 15/24415-<br>1 KnoRe 1     | yes | neg     | nt      | D  | 4 |
| <b>115</b> |    | 15/24415-<br>1 KnoRe 2     | yes | neg     | nt      | D  | 4 |
| <b>116</b> |    | 15/24415-<br>1 KnoRe 3     | yes | neg     | nt      | D  | 3 |
| <b>117</b> |    | 16/00910-<br>3 KnoRe 1     | yes | neg     | BR45    | B2 | 2 |
| <b>118</b> |    | 16/00910-<br>3 KnoRe 2     | yes | neg     | nt      | A  | 2 |
| <b>119</b> |    | 16/00910-<br>3 KnoRe 3     | yes | O78:K80 | BR45    | B2 | 2 |
| <b>120</b> |    | 16/02374-<br>1 KnoRe 1     | yes | O78:K80 | BR32ST1 | D  | 4 |
| <b>121</b> |    | 16/02374-<br>1 KnoRe 2     | yes | O78:K80 | BR32ST1 | D  | 4 |
| <b>122</b> |    | 16/02374-<br>1 KnoRe 3     | yes | O78:K80 | BR32ST1 | D  | 4 |

|            |    |                    |     |         |         |    |   |
|------------|----|--------------------|-----|---------|---------|----|---|
| <b>123</b> |    | 16/02374-1 KnoLi 1 | yes | O78:K80 | BR32ST1 | D  | 4 |
| <b>124</b> |    | 16/02374-1 KnoLi 2 | yes | O78:K80 | BR32ST1 | D  | 4 |
| <b>125</b> |    | 16/02374-1 KnoLi 3 | yes | O78:K80 | BR32ST1 | D  | 4 |
| <b>126</b> | 15 | 15/20279-2 KnoRe 1 | no  | neg     | BR34    | D  | 2 |
| <b>127</b> |    | 15/20279-2 KnoRe 2 | no  | neg     | BR34    | D  | 2 |
| <b>128</b> |    | 15/20279-2 KnoRe 3 | no  | neg     | BR34    | D  | 2 |
| <b>129</b> |    | 15/24414-5 KnoRe 1 | yes | neg     | BR6     | D  | 4 |
| <b>130</b> |    | 15/24414-5 KnoRe 2 | yes | neg     | BR6     | D  | 4 |
| <b>131</b> |    | 15/24414-5 KnoRe 3 | yes | neg     | BR6     | D  | 4 |
| <b>132</b> |    | 16/01523-1 KnoLi 1 | yes | O2:K1   | BR9     | B2 | 4 |
| <b>133</b> |    | 16/01523-1 KnoLi 2 | yes | O2:K1   | BR9     | B2 | 4 |
| <b>134</b> |    | 16/01523-1 KnoLi 3 | yes | O2:K1   | BR9     | B2 | 4 |
| <b>135</b> |    | 16/01523-3 KnoRe 1 | yes | neg     | BR8     | D  | 2 |
| <b>136</b> |    | 16/01523-3 KnoRe 2 | yes | neg     | BR8     | D  | 2 |
| <b>137</b> |    | 16/01523-3 KnoRe 3 | yes | neg     | BR1ST1  | D  | 1 |
| <b>138</b> |    | 16/02751-3 KnoRe 1 | no  | neg     | BR1ST1  | D  | 1 |
| <b>139</b> |    | 16/02751-3 KnoRe 2 | no  | neg     | BR1ST1  | D  | 1 |
| <b>140</b> | 15 | 16/02751-3 KnoRe 3 | no  | neg     | BR1ST1  | D  | 1 |
| <b>141</b> |    | 15/24412-3 KnoRe 1 | yes | neg     | BR29    | B2 | 4 |
| <b>142</b> |    | 15/24412-3 KnoRe 2 | yes | neg     | BR29    | B2 | 3 |
| <b>143</b> |    | 15/24412-3 KnoRe 3 | yes | neg     | BR29    | B2 | 3 |
| <b>144</b> | 17 | 15/19580-2 KnoRe 1 | yes | O78:K80 | BR32ST4 | D  | 4 |
| <b>145</b> |    | 15/19580-2 KnoRe 2 | yes | O78:K80 | BR32ST4 | D  | 4 |
| <b>146</b> |    | 15/19580-2 KnoRe 3 | yes | O78:K80 | BR32ST4 | D  | 4 |
| <b>147</b> |    | 15/20949-1 KnoLi 1 | yes | neg     | BR32ST4 | D  | 4 |
| <b>148</b> |    | 15/20949-1 KnoLi 2 | yes | neg     | BR32ST4 | D  | 4 |

|            |    |                        |     |       |         |    |   |
|------------|----|------------------------|-----|-------|---------|----|---|
| <b>149</b> |    | 15/20949-<br>1 KnoLi 3 | yes | neg   | BR32ST4 | D  | 4 |
| <b>150</b> |    | 15/23207-<br>1 KnoRe 1 | no  | neg   | BR11    | A  | 2 |
| <b>151</b> |    | 15/23207-<br>1 KnoRe 2 | no  | neg   | BR40    | B1 | 2 |
| <b>152</b> |    | 15/23207-<br>1 KnoRe 3 | no  | neg   | BR27    | B1 | 2 |
| <b>153</b> |    | 15/24161-<br>3 KnoLi 1 | yes | neg   | BR37    | A  | 2 |
| <b>154</b> |    | 16/02298-<br>3 KnoRe 1 | yes | O2:K1 | BR14ST1 | B2 | 3 |
| <b>155</b> |    | 16/02298-<br>3 KnoLi 1 | no  | O2:K1 | BR14ST1 | B2 | 3 |
| <b>156</b> |    | 16/02298-<br>3 KnoLi 2 | no  | O2:K1 | BR14ST1 | B2 | 3 |
| <b>157</b> |    | 16/02298-<br>3 KnoLi 3 | no  | O2:K1 | BR14ST1 | B2 | 3 |
| <b>158</b> | 18 | 15/19460-<br>1 KnoRe 1 | yes | neg   | nt      | D  | 4 |
| <b>159</b> |    | 15/19460-<br>1 KnoRe 2 | yes | neg   | nt      | D  | 4 |
| <b>160</b> |    | 15/19460-<br>1 KnoRe 3 | yes | neg   | nt      | D  | 4 |
| <b>161</b> |    | 15/21788-<br>2 KnoLi 1 | yes | neg   | BR8     | B2 | 4 |
| <b>162</b> |    | 15/21788-<br>2 KnoLi 2 | yes | neg   | BR8     | B2 | 4 |
| <b>163</b> |    | 15/21788-<br>2 KnoLi 3 | yes | neg   | BR8     | B2 | 4 |
| <b>164</b> | 19 | 15/23732-<br>2 KnoLi 1 | yes | neg   | BR18    | D  | 4 |
| <b>165</b> |    | 15/23732-<br>2 KnoLi 2 | yes | neg   | BR18    | D  | 4 |
| <b>166</b> |    | 15/23732-<br>2 KnoLi 3 | yes | neg   | BR18    | D  | 4 |
| <b>167</b> |    | 16/01362-<br>3 KnoLi 1 | no  | neg   | BR15    | B2 | 3 |
| <b>168</b> |    | 16/01362-<br>3 KnoLi 2 | no  | neg   | BR15    | B2 | 3 |
| <b>169</b> |    | 16/01362-<br>3 KnoLi 3 | no  | neg   | BR25    | B2 | 2 |
| <b>170</b> |    | 16/01362-<br>2 KnoRe 1 | no  | neg   | BR16    | B2 | 3 |
| <b>171</b> |    | 16/01362-<br>2 KnoRe 2 | no  | neg   | BR16    | B2 | 3 |
| <b>172</b> |    | 16/01362-<br>2 KnoRe 3 | no  | neg   | BR16    | B2 | 3 |
| <b>173</b> |    | 16/02598-<br>1 KnoRe 1 | yes | neg   | BR16    | B2 | 3 |
| <b>174</b> |    | 16/02598-<br>1 KnoRe 2 | yes | neg   | BR36    | A  | 2 |

|     |    |                    |     |         |         |    |   |
|-----|----|--------------------|-----|---------|---------|----|---|
| 175 |    | 16/02598-1 KnoRe 3 | yes | neg     | BR16    | B2 | 3 |
| 176 | 20 | 15/20264-3 KnoLi 1 | no  | neg     | BR24    | D  | 4 |
| 177 |    | 15/20264-3 KnoLi 2 | no  | neg     | BR24    | D  | 4 |
| 178 |    | 15/20264-3 KnoLi 3 | no  | neg     | BR24    | D  | 4 |
| 179 |    | 15/23731-2 KnoRe 1 | yes | neg     | BR18    | D  | 4 |
| 180 |    | 15/23731-2 KnoRe 2 | yes | neg     | BR18    | D  | 4 |
| 181 |    | 15/23731-2 KnoRe 3 | yes | neg     | BR18    | D  | 4 |
| 182 |    | 15/24861-3 KnoRe 1 | yes | O2:K1   | BR13    | B2 | 4 |
| 183 |    | 15/24861-3 KnoRe 2 | yes | O2:K1   | BR13    | B2 | 4 |
| 184 |    | 15/24861-3 KnoRe 3 | yes | neg     | BR13    | B2 | 4 |
| 185 |    | 16/01363-1 KnoLi 1 | no  | neg     | BR15    | B2 | 3 |
| 186 |    | 16/01363-1 KnoLi 2 | no  | neg     | BR15    | B2 | 3 |
| 187 |    | 16/01363-1 KnoLi 3 | no  | neg     | BR15    | B2 | 3 |
| 188 | 21 | 15/17098-2 KnoRe 1 | yes | neg     | BR21    | A  | 2 |
| 189 |    | 15/17098-2 KnoRe 2 | yes | neg     | BR21    | A  | 2 |
| 190 |    | 15/17098-2 KnoRe 3 | yes | neg     | BR21    | A  | 2 |
| 191 |    | 15/19104-2 KnoRe 1 | no  | O2:K1   | BR33    | B2 | 4 |
| 192 |    | 15/19104-2 KnoRe 2 | no  | O2:K1   | BR33    | B2 | 4 |
| 193 |    | 15/19104-2 KnoRe 3 | no  | O2:K1   | BR33    | B2 | 4 |
| 194 |    | 15/19103-3 KnoLi 1 | yes | O78:K80 | BR3     | A  | 2 |
| 195 |    | 15/19103-3 KnoLi 2 | yes | O78:K80 | BR3     | A  | 2 |
| 196 |    | 15/19103-3 KnoLi 3 | yes | O78:K80 | BR3     | A  | 2 |
| 197 |    | 15/20799-2 KnoRe 1 | yes | neg     | BR4     | B1 | 2 |
| 198 |    | 15/20799-2 KnoRe 2 | yes | neg     | BR4     | B1 | 2 |
| 199 |    | 15/20799-2 KnoRe 3 | yes | neg     | BR4     | B1 | 2 |
| 200 |    | 15/24599-3 KnoRe 1 | no  | O78:K80 | BR32ST2 | D  | 4 |



|            |                        |     |         |         |   |   |
|------------|------------------------|-----|---------|---------|---|---|
| <b>201</b> | 15/24599-<br>3 KnoRe 2 | no  | O78:K80 | BR32ST3 | D | 4 |
| <b>202</b> | 15/24599-<br>3 KnoRe 3 | no  | O78:K80 | BR32ST2 | D | 4 |
| <b>203</b> | 15/25396-<br>3 KnoRe 1 | no  | O78:K80 | BR32    | D | 1 |
| <b>204</b> | 15/25396-<br>3 KnoRe 2 | no  | O78:K80 | BR32    | D | 1 |
| <b>205</b> | 15/25396-<br>3 KnoRe 3 | no  | O78:K80 | BR32    | D | 1 |
| <b>206</b> | 15/25396-<br>3 KnoLi 1 | yes | O78:K80 | BR32    | D | 4 |
| <b>207</b> | 15/25396-<br>3 KnoLi 2 | yes | O78:K80 | BR32    | D | 4 |
| <b>208</b> | 15/25396-<br>3 KnoLi 3 | yes | O78:K80 | BR32    | D | 4 |
